# Supplementary material for: Dual pyroptotic biomarkers predict erythroid response in lower-risk non-del(5q) myelodysplastic syndromes treated with lenalidomide and recombinant erythropoietin
Source: PubMed Central journal article supplement — Haematologica. 2021 Aug 5;107(3):737–9. doi: 10.3324/haematol.2021.278855 (PMC8883562; doi:10.3324/haematol.2021.278855), 2021-08-05
Supplement: 2021_278855_WANG_SUPPL.pdf [file 2021_278855_WANG_SUPPL.pdf]

**Dual pyroptotic biomarkers predict erythroid response in lower-risk non-del(5q) myelodysplastic syndromes treated with lenalidomide and recombinant erythropoietin**

Chen Wang,<sup>1,2</sup> Kathy L. McGraw,<sup>2</sup> Amy F. McLemore,<sup>2</sup> Rami Komrokji,<sup>2</sup> Ashley A. Basiorka,<sup>2</sup> Najla Al Ali,<sup>2</sup> Jeffrey E. Lancet,<sup>2</sup> Eric Padron,<sup>2</sup> Olivier Kosmider,<sup>3</sup> Michaela Fontenay,<sup>3</sup> Pierre Fenaux,<sup>4</sup> Alan F. List<sup>2#</sup> and David A. Sallman<sup>2#</sup>

<sup>1</sup>Department of Internal Medicine, University of South Florida, Morsani College of Medicine, Tampa, FL, USA; <sup>2</sup>Department of Malignant Hematology, H. Lee Moffitt Cancer Center and Research Institute, Tampa, FL, USA; <sup>3</sup>Service d'Hématologie Biologique, Assistance Publique-Hôpitaux de Paris. Centre-Université de Paris, Hôpital Cochin, Paris, France and <sup>4</sup>Groupe Francophone des Myélodysplasies, Hôpital Saint Louis, Paris, France

#AFL and DAS contributed equally as co-senior authors.

Correspondence:

DAVID A. SALLMAN - david.sallman@moffitt.org

doi:10.3324/haematol.2021.278855

**Supplement table.** Patient's characteristics based on treatment

| <b>Median (range) or N (%)</b>               | <b>All<br/>(n = 69)</b>   | <b>Lenalidomide<br/>(n = 31)</b> | <b>Lenalidomide plus<br/>epoetin <math>\beta</math> (n = 38)</b> | <b>P*</b> |
|----------------------------------------------|---------------------------|----------------------------------|------------------------------------------------------------------|-----------|
| <i>Demographics</i>                          |                           |                                  |                                                                  |           |
| Age (years)                                  | 73 (46-86)                | 73 (54-79)                       | 74 (46-86)                                                       | 0.089     |
| Male (%)                                     | 48 (69.6)                 | 19 (61.3)                        | 29 (76.3)                                                        | 0.177     |
| <i>Clinical features</i>                     |                           |                                  |                                                                  |           |
| Hemoglobin (g/dL)                            | 8.1 (6.3-10.0)            | 7.8 (6.8-9.6)                    | 8.1 (6.3-10.0)                                                   | 0.064     |
| ANC (/mm <sup>3</sup> )                      | 2.1 (0.15-10.06) (n = 67) | 2.00 (0.15-10.06) (n = 30)       | 2.60 (0.40-5.70) (n = 37)                                        | 0.695     |
| Platelet (10 <sup>3</sup> /mm <sup>3</sup> ) | 235 (58-587) (n = 67)     | 209 (68-494) (n = 30)            | 242 (58-587) (n = 37)                                            | 0.854     |
| Serum EPO > 200 mU/mL (%)                    | 27 (48.2) (n = 56)        | 12 (n = 29)                      | 15 (n = 27)                                                      | 0.289     |
| Bone marrow blast > 2% (%)                   | 27 (39.1)                 | 8 (25.8)                         | 19 (50.0)                                                        | 0.041     |
| Bone marrow erythroblast (%)                 | 28.9 (1.0-79.0) (n = 67)  | 36.7 (1.0-65.0) (n = 30)         | 27.0 (4.4-79.0) (n = 37)                                         | 0.308     |
| RARS (%)                                     | 38 (55.1)                 | 17 (54.8)                        | 21 (55.3)                                                        | 0.972     |
| Favorable karyotype (%)                      | 59 (86.8) (n = 68)        | 27 (87.1)                        | 32 (86.5) (n = 37)                                               | 1.000     |
| <i>Splicesome mutation</i>                   |                           |                                  |                                                                  |           |
| <i>SF3B1</i> (%)                             | 52 (75.4)                 | 26 (83.9)                        | 26 (68.4)                                                        | 0.168     |
| <i>U2AF</i> (%)                              | 0 (0.0)                   | 0 (0.0)                          | 0 (0.0)                                                          | 1.000     |
| <i>SRSF2</i> (%)                             | 6 (8.7)                   | 4 (12.9)                         | 2 (5.3)                                                          | 0.397     |
| <i>ZRSR2</i> (%)                             | 5 (7.2)                   | 2 (6.5)                          | 3 (7.9)                                                          | 1.000     |
| <i>Epigenetic mutation</i>                   |                           |                                  |                                                                  |           |
| <i>TET2</i> (%)                              | 34 (49.3)                 | 14 (45.2)                        | 20 (52.6)                                                        | 0.537     |
| <i>IDH</i> (%)                               | 2 (2.9)                   | 2 (6.5)                          | 0 (0.0)                                                          | 0.198     |
| <i>DNMT3A</i> (%)                            | 13 (18.9)                 | 6 (19.4)                         | 7 (18.4)                                                         | 0.921     |
| <i>ASXL1</i> (%)                             | 12 (17.4)                 | 8 (25.8)                         | 4 (10.5)                                                         | 0.119     |
| <i>EZH2</i> (%)                              | 2 (2.9)                   | 0 (0.0)                          | 2 (5.3)                                                          | 0.498     |
| Number of mutations                          | 2 (0-6)                   | 2 (1-6)                          | 2 (0-6)                                                          | 0.515     |
| IPSS low risk (%)                            | 33 (48.5) (n = 68)        | 16 (51.6)                        | 17 (45.9) (n = 37)                                               | 0.641     |
| <i>Biomarker</i>                             |                           |                                  |                                                                  |           |
| ASC specks > median (%)                      | 34 (49.3)                 | 11 (35.5)                        | 23 (60.5)                                                        | 0.039     |
| <i>Treatment</i>                             |                           |                                  |                                                                  |           |
| Prior responder to recombinant EPO (%)       | 24 (35.8) (n = 67)        | 9 (29.0) (n = 31)                | 15 (41.7) (n = 36)                                               | 0.282     |
| Responder (%)                                | 28 (40.6)                 | 7 (22.6)                         | 21 (55.3)                                                        | 0.006     |

\* Continuous variables were compared by Mann-Whitney test, and categorical variables were compared using Fisher's exact test or chi-square test, as appropriate.

Abbreviations: ANC, absolute neutrophil count; EPO, erythropoietin; RARS, refractory anemia with ring sideroblasts; IPSS, international prognostic score system; ASC, apoptosis-associated speck-like protein containing a CARD.
